# Supplementary material for: Pairwise selection assembly for sequence-independent construction of long-length DNA
Source: PubMed Central journal article supplement — Nucleic Acids Res. 2010 Mar 1;38(8):2594–602. doi: 10.1093/nar/gkq123 (PMC2860126; doi:10.1093/nar/gkq123), 2010-03-01
Supplement: gkq123_1.pdf [file gkq123_1.pdf]

## Supplementary Material

Pairwise selection assembly for sequence-independent construction of long-length DNA

William J. Blake<sup>\*†</sup>, Brad A. Chapman, Anuradha Zindal, Michael E. Lee, Shaun M. Lippow, and Brian M. Baynes<sup>‡</sup>

Codon Devices, Inc., One Kendall Square, Building 300, Cambridge, MA 02139

<sup>†</sup>Current address: GreenLight Biosciences, Inc., 200 Boston Avenue, Medford, MA 02155 USA

<sup>‡</sup>Current address: Flagship Ventures, One Memorial Drive, 7th Floor, Cambridge, MA 02142 USA

<sup>\*</sup>To whom correspondence should be addressed. Tel +1 617 279 2587;  
Email: wblake@glbiosciences.com

### Contents:

|                                                                    |   |
|--------------------------------------------------------------------|---|
| Table S1: PSA cassette sequences.....                              | 2 |
| Table S2: PSA tag and blocking oligo sequences.....                | 3 |
| Figure S1: PSA level 0 sub-fragment block/digest.....              | 3 |
| Figure S2: PSA level 1 digest screen for selection in culture..... | 5 |
| Figure S3: PSA level 1 sub-fragment block/digest.....              | 7 |
| Figure S4: PSA level 2 digest screen for selection in culture..... | 8 |

**Table S1:** PSA cassette sequences. Intergenic regions in CK and TS cassettes containing abutting BsaI, NotI, and BsmBI sites are underlined.

|                        |                                                                                                                                                                                                                                                                                                                                                                                                                                                                                                                                                                                                                                                                                                                                                                                                                                                                                                                                                                                                                                                                                                                                                                                                                                                                                                                                                                                                                                                                                                                                                                                                                                                                                                                                                                                                                                                                                                                                                                                                                                                                                                                                                                                                                                          |
|------------------------|------------------------------------------------------------------------------------------------------------------------------------------------------------------------------------------------------------------------------------------------------------------------------------------------------------------------------------------------------------------------------------------------------------------------------------------------------------------------------------------------------------------------------------------------------------------------------------------------------------------------------------------------------------------------------------------------------------------------------------------------------------------------------------------------------------------------------------------------------------------------------------------------------------------------------------------------------------------------------------------------------------------------------------------------------------------------------------------------------------------------------------------------------------------------------------------------------------------------------------------------------------------------------------------------------------------------------------------------------------------------------------------------------------------------------------------------------------------------------------------------------------------------------------------------------------------------------------------------------------------------------------------------------------------------------------------------------------------------------------------------------------------------------------------------------------------------------------------------------------------------------------------------------------------------------------------------------------------------------------------------------------------------------------------------------------------------------------------------------------------------------------------------------------------------------------------------------------------------------------------|
| <p>CK<br/>cassette</p> | <p>TTACGCCCCGCCCTGCCACTCATCGCAGTACTGTTGTAATTCATTAAGCATTCTGCCGACATGGAAGC<br/> CATCACAAACGGGCATGATGAACCTGAATCGCCAGCGGCATCAGCACCTTGTCGCCTTGCGTATAATAT<br/> TTGCCCATGGTGAAAACGGGGCGAAGAAGTTGTCCATATTGGCCACGTTTAAATCAAACTGGTGAA<br/> ACTCACCCAGGGATTGGCTGATACGAAAAACATATTCTCAATAAACCCCTTTAGGGAAATAGGCCAGGT<br/> TTTCACCGTAACACGCCACATCTTGCGAATATATGTGTAGAACTGCCGAAATCGTCGTGGTATTCA<br/> CTCCAGAGCGATGAAAACGTTTCAGTTTGCTCATGAAAAACGGTGTAAACAAGGGTGAACACTATCCCA<br/> TATCACCAGTACCCTTTTTCATTGGCATAACGGATCCGGATGAGCATTTCATCAGGCGGGCAAGAA<br/> TGTGAATAAAGGCCGGATAAAAACCTTGCTTATTTTTCTTTACGGTCTTTAAAAAAGGCCGTAATATCC<br/> AGCTGAACGGTCTGGTTATAGGTACATTGAGCAACTGACTGAAATGCCTCAAAATGTTCTTTACGATG<br/> CCATTGGGATATATCAACGGTGGTATATCCAGTGATTTTTTTTGTTCAGAGACC GCGGCCGCTCTC<br/> TTGAGCCATATTC AACGGGAAACGTCCTTGCTCGAGGCCGCGATTAAATCCAACATGGATGCTGATTT<br/> ATATGGGTATAAATGGGCTCGCGATAATGTCGGGCAATCAGGTGCGACAATCTATCGATTGTATGGGA<br/> AGCCCGATGCGCCAGAGTTGTTTCTGAAACATGGCAAAGGTAGCGTTGCCAATGATGTTACAGATGAG<br/> ATGGTCAGACTAAACTGGCTGACGGAATTTATGCCTCTTCCGACCATCAAGCATTTTATCCGTACTCC<br/> TGATGATGCATGGTTACTCACCCTGCGATCCCCGGGAAAACAGCATTCCAGGTATTAGAAGAATATC<br/> CTGATTCAGGTGAAAATATTGTTGATGCGCTGGCAGTGTTCTGCGCCGGTTGCATTTCGATTCCTGTT<br/> TGTAATTGTCCTTTT AACAGCGATCGCGTATTTTCGCCTCGCTCAGGCGCAATCACGAATGAATAACGG<br/> TTTGTTGATGCGAGTGATTTTGTGACGAGCGTAATGGCTGGCCTGTTGAACAAGTCTGGAAAGAAA<br/> TGCATAAATGTTGCCATTTCTACCGGATTCAGTGTCACTCATGGTGATTTCTCACTTGATAACCTT<br/> ATTTTTGACGAGGGGAAATTAATAGGTTGATTTGATGTTGGACGAGTCGGAATCGCAGACCGATAACA<br/> GGATCTTGCCATCCTATGGAACGCTCGGTGAGTTTTCTCCTTCATTACAGAAACGGCTTTTTTCAA<br/> AATATGGTATTGATAATCCTGATATGAATAAATTGCAGTTTCATTTGATGCTCGATGAGTTTTTCTAA</p>                                                                                                                                                                                                                                                                                                                                                                                                                                                                                                                                                   |
| <p>TS<br/>cassette</p> | <p>TTAGGTCGAGGTGGCCCGGCTCCATGCACCGCGACGCAACGCGGGGAGGCAGACAAGGTATAGGGCGG<br/> CGCCTACAATCCATGCCAACCCTGTTCCATGTGCTCGCCGAGGCGGCATAAATCGCCGTGACGATCAGC<br/> GGTCCAGTGATCGAAGTTAGGCTGGTAAGAGCCCGGAGCGATCCTTGAAGCTGCCTGATGGTCTGTC<br/> ATCTACCTGGCGGGACAGCATGGCCTGCAACGCGGGCATCCCGATGCCCGGGAAGCGAGAAGAATCA<br/> TAATGGGGAAGGCCATCCAGCCTCGCGTCCGGAACGCCAGCAAGACGTAGCCCAGCGCGTCCGGCCG<br/> ATGCCGGCGATAATGGCCTGCTTCTCGCCGAAACGTTTGGTGGCGGGACCAGTGACGAAGGCTTGAGC<br/> GAGGGCGTGCAAGATTCCGAATACCGCAAGCGACAGGCCGATCATCGTCGCGCTCCAGCGAAAGCGGT<br/> CCTCGCCGAAAATGACCCAGAGCGCTGCCGGCACCCTGTCCTACGAGTTGCATGATAAAGAATACAGTC<br/> ATAAGTTCCGGGACGATAGTCATGCCCGCCACCCTGGGAAGGAGCTGACTGGGTTGAAGCTTCTCAA<br/> GGCATCGGTGACGCTCTCCCTTATGCGACTCCTGCATTAGGAAGCAGCCCAGTAGTGGTTGAGGC<br/> CGTTGAGCACCGCCCGCAAGGAATGGTGCATGCAAGGAGATGGCGCCCAACAGTCCCCCGGCCACG<br/> GGCCTGCCACCATACCCACGCCGAAACAAGCGCTCATGAGCCCAGTGGCGAGCCCAGTCTTCCCC<br/> ATCGGTGATGTCGGCGATATAGGCGCCAGCAACCGCACCTGTGGCGCCGGTATGCCGGCCACGATGC<br/> GTCCGGCGTAGAGGATCCACAGGACGGGTGTGGTCCCATGATCGCGTAGTCGATAGTGGCTCCAAGT<br/> AGCGAAGCGAGCAGGACTGGGCGGGCCAAAGCGGTCCGACAGTGTCCGAGAACGGGTGCGCATAG<br/> AAATTGCATCAACGCATATAGCGCTAGCAGCACGCCATAGTACTGGCGATGCTGTGCGAATGGACGA<br/> TATCCCGCAAGAGGCCCGGCAGTACCGGCATAACCAAGCCTATGCCTACAGCATCCAGGGTGACGGTG<br/> CCGAGGATGACGATGAGCGCATTGTTAGATTTCAAGAGACC GCGGCCGCTCTCTT GAGGGAAGCGG<br/> TGATCGCCGAAGTATCGACTCAACTATCAGAGGTAGTTGGCGTCATCGAGCGCCATCTCGAACCGACG<br/> TTGCTGGCCGTACATTTGTACGGCTCCGCAGTGGATGGCGGCCTGAAGCCACACAGTGATATTGATTT<br/> GCTGGTTACGGTGACCGTAAGGCTTGATGAAACAACCGCGGAGCTTTGATCAACGACCTTTTGAAA<br/> CTTCCGGCTTCCCCTGGAGAGAGCGAGATTTCCCGCTGTAGAAGTCACCATTGTTGTGACAGCAGC<br/> ATCATTCCGTGGCGTTATCCAGCTAAGCGCAACTGCAATTTGGAGAATGGCAGCGCAATGACATTCT<br/> TGCTGGTATCTTCGAGCCAGCCACGATCGACATTGATCTGGCTATCTTGCTGACAAAAGCAAGAGAAC<br/> ATAGCGTTGCCTTGGTAGGTCCAGCGCGGAGGAACCTTTGATCCGGTTCCTGAACAGGATCTATTT<br/> GAGGCGCTAAATGAAACCTTAACGCTATGAAACTCGCCGCCGACTGGGCTGGCGATGAGCGAAATGT<br/> AGTGCTTACGTTGTCCGCATTTGGTACAGCGCAGTAAACCGGAAAATCGCGCAAGGATGTCGCTG<br/> CCGACTGGGCAATGGAGCGCCTGCCGGCCAGTATCAGCCCGTCATACTTGAAGTCAGCAGGCTTAT<br/> CTTGACAAGAAGAAGATCGCTTGGCCTCGCGCGCAGATCAGTTGGAAGAATTTGTCCACTACGTGAA<br/> AGGCGAGATACCAAGGTAGTCGGCAATAA</p> |

**Table S2:** PSA tags and blocking oligo sequences. BsmBI and BtgZI restriction sites are underlined, and marker start codons are shown in bold. Overhangs generated within the sequence being constructed are indicated by NNNN.

|                    |                                                                                                 |
|--------------------|-------------------------------------------------------------------------------------------------|
| upstream tag       | TT <b>CAT</b> <u>GAGACGATCTCCTTCTCTT</u> GATGGCTGTAATAATAGCTCTAGGG <u>GCGAT</u> GTTAAGACAACNNNN |
| downstream tag     | NNNNGAGACGTTGACAACATGAAGTAAACAGCGTAAGATGTACCACATGAAATT <u>GCGATGAGGAAATCTATGAG</u>              |
| L block upstream   | CATGAGACGATCTCCTTCTCTT <u>GATGGCTGTAATAATAGCTCTAGGGGCGATGTTAAGAC</u>                            |
| L block downstream | CGAGACGTTGACAACATGAAGTAAACAGCGTAAGATGTACCACATGAAATT <u>GCGATGAGG</u>                            |
| R block upstream   | GTCTTAACATCGCCCTAGAGCTATTATTACAGCCATCAAGAGGAAGGAGATCGTCTCATG                                    |
| R block downstream | CATAGATTTCTCATCGCAATTTCATGTGGTACATCTTACGCTGTTTACTTCATGTTGTC                                     |

**Figure S1:** PSA level 0 sub-fragment block/digest. 64 sub-fragments from PSA level 0 in pCK were blocked and digested, and 15  $\mu$ l (225 ng) of the heat-inactivated digest was run on a 0.7% agarose gel for analysis. Sub-fragments with internal sites that require blocking are indicated with asterisks (\*\*), and all sub-fragment sizes are indicated. L sub-fragments (**a** and **c**) were digested with 1 unit of BsmBI, and R sub-fragments (**b** and **d**) were digested with 2 units of BtgZI. DNA marker (Mk) is indicated and expected insert bands are circled.

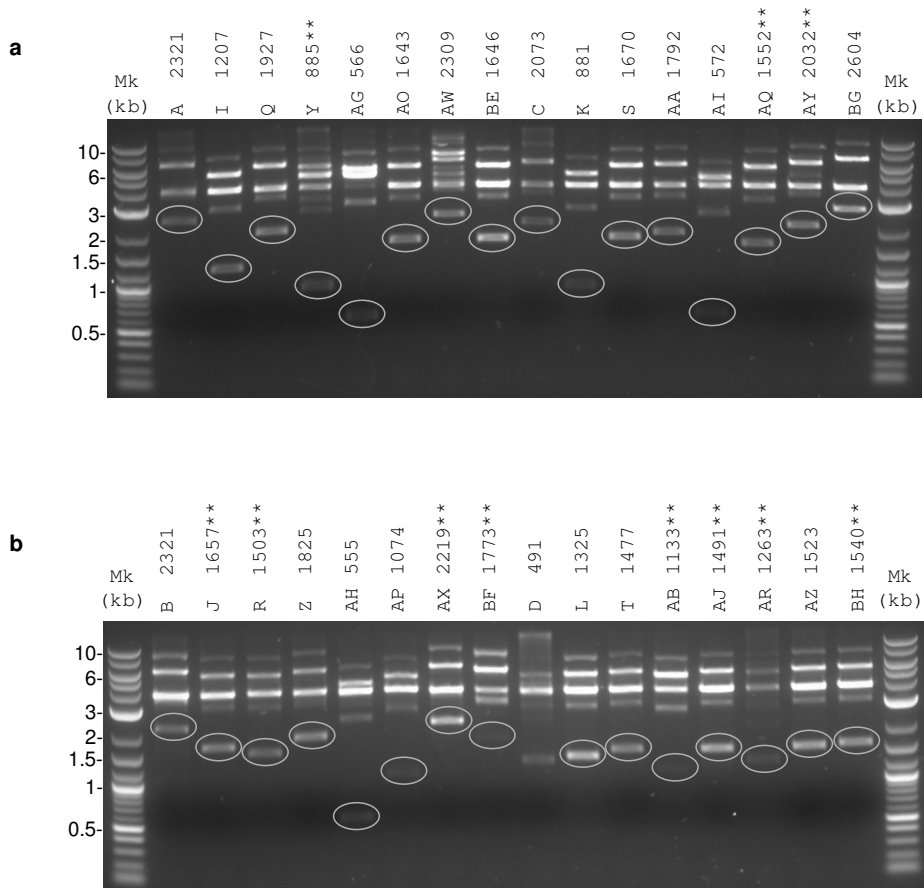

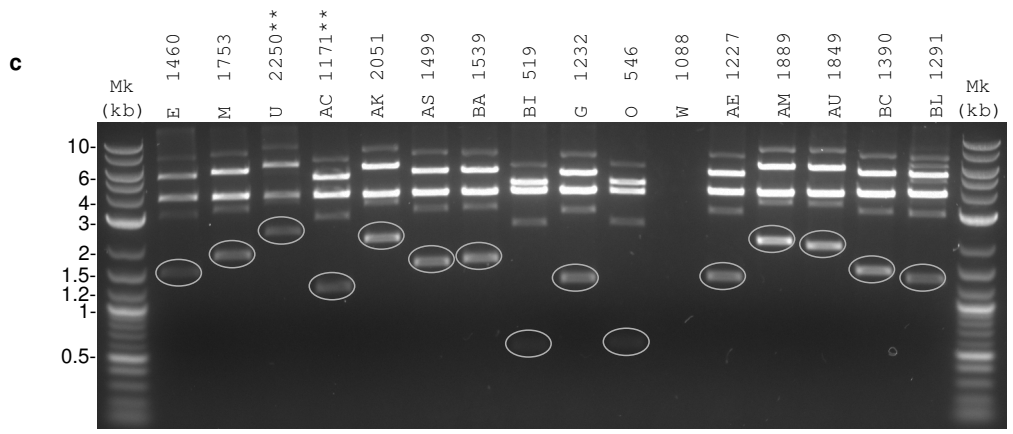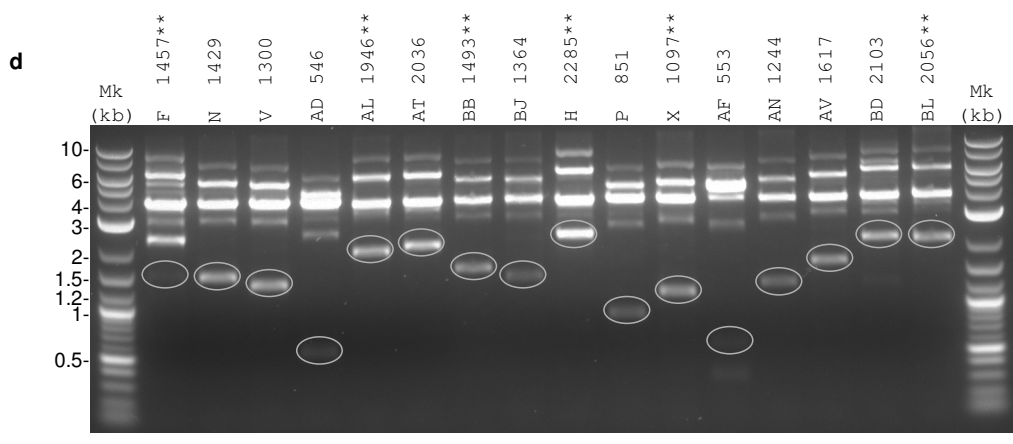

**Figure S2:** PSA level 1 product screening for selection in culture. Approximately 400 ng of prepped DNA was digested with BsmBI and run on a 0.7% agarose gel for analysis (**a,c**). Products containing internal BsmBI sites are indicated with asterisks (\*\*), and expected fragment sizes are given in (**b,d**). DNA marker (Mk) is indicated and expected insert bands are circled.

**a**

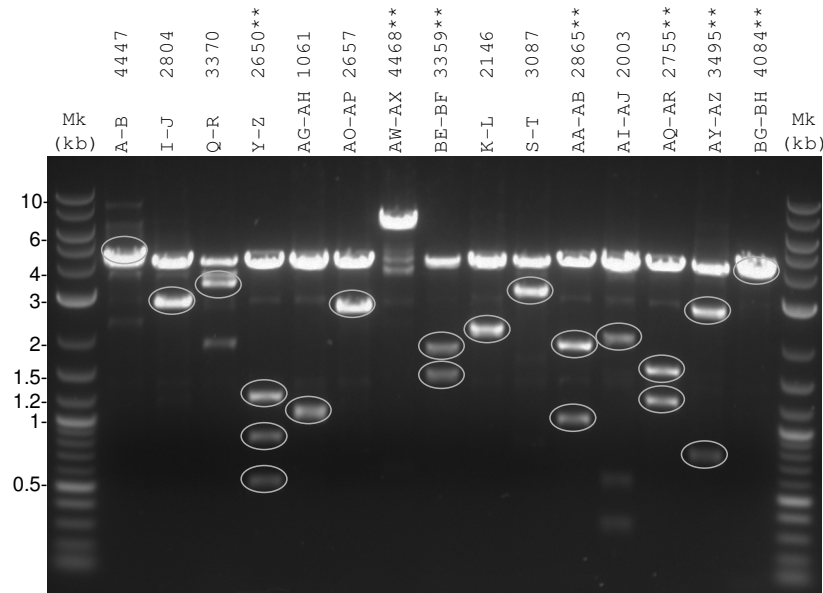

**b**

| sub-fragment | expected sizes for internal cuts (**) | sub-fragment | expected sizes for internal cuts (**) |
|--------------|---------------------------------------|--------------|---------------------------------------|
| A-B          |                                       | C-D          | not pictured                          |
| I-J          |                                       | K-L          |                                       |
| Q-R          |                                       | S-T          |                                       |
| Y-Z          | 563, 862, 1230                        | AA-AB        | 1008, 1862                            |
| AG-AH        |                                       | AI-AJ        |                                       |
| AO-AP        |                                       | AQ-AR        | 1199, 1561                            |
| AW-AX        | 664, 3809                             | AY-AZ        | 789, 2711                             |
| BE-BF        | 1499, 1865                            | BG-BH        | 87, 4002                              |

**c**

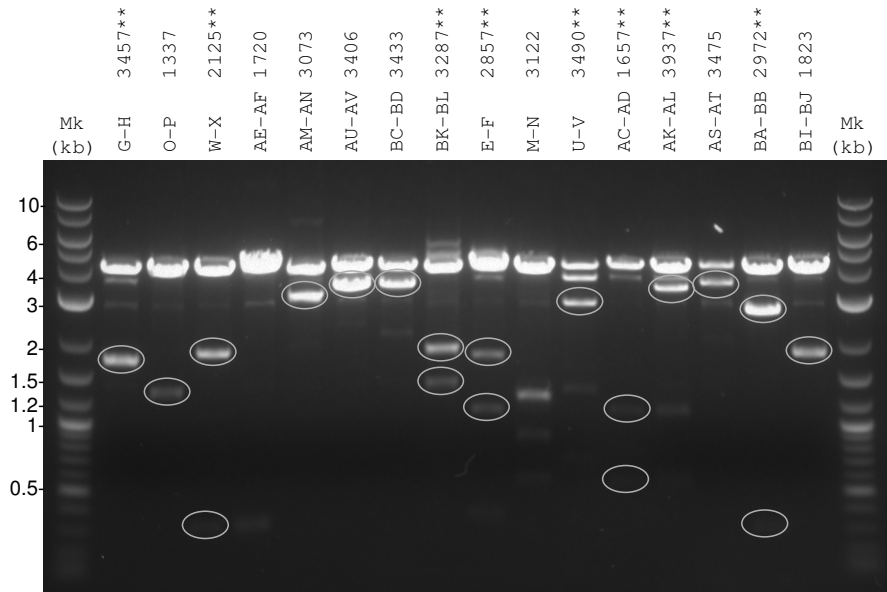

**d**

| sub-fragment | expected sizes for internal cuts (**) |
|--------------|---------------------------------------|
| E-F          | 1095, 1763                            |
| M-N          |                                       |
| U-V          | 696, 2799                             |
| AC-AD        | 10, 548, 1104                         |
| AK-AL        | 681, 3347                             |
| AS-AT        |                                       |
| BA-BB        | 308, 2669                             |
| BI-BJ        |                                       |

| sub-fragment | expected sizes for internal cuts (**) |
|--------------|---------------------------------------|
| G-H          | 1713, 1734                            |
| O-P          |                                       |
| W-X          | 312, 1818                             |
| AE-AF        |                                       |
| AM-AN        |                                       |
| AU-AV        |                                       |
| BC-BD        |                                       |
| BK-BL        | 1402, 1890                            |

**Figure S3:** PSA level 1 sub-fragment block/digest. 32 sub-fragments from PSA level 1 in pTS were blocked and digested, and 15  $\mu$ l (225 ng) of the heat-inactivated digest was run on a 0.7% agarose gel for analysis. Sub-fragments with internal sites that require blocking are indicated with asterisks (\*\*), and all sub-fragment sizes are indicated. L sub-fragments (a) were digested with 1 unit of BsmBI, and R sub-fragments (b) were digested with 2 units of BtgZI. DNA marker (Mk) is indicated and expected insert bands are circled.

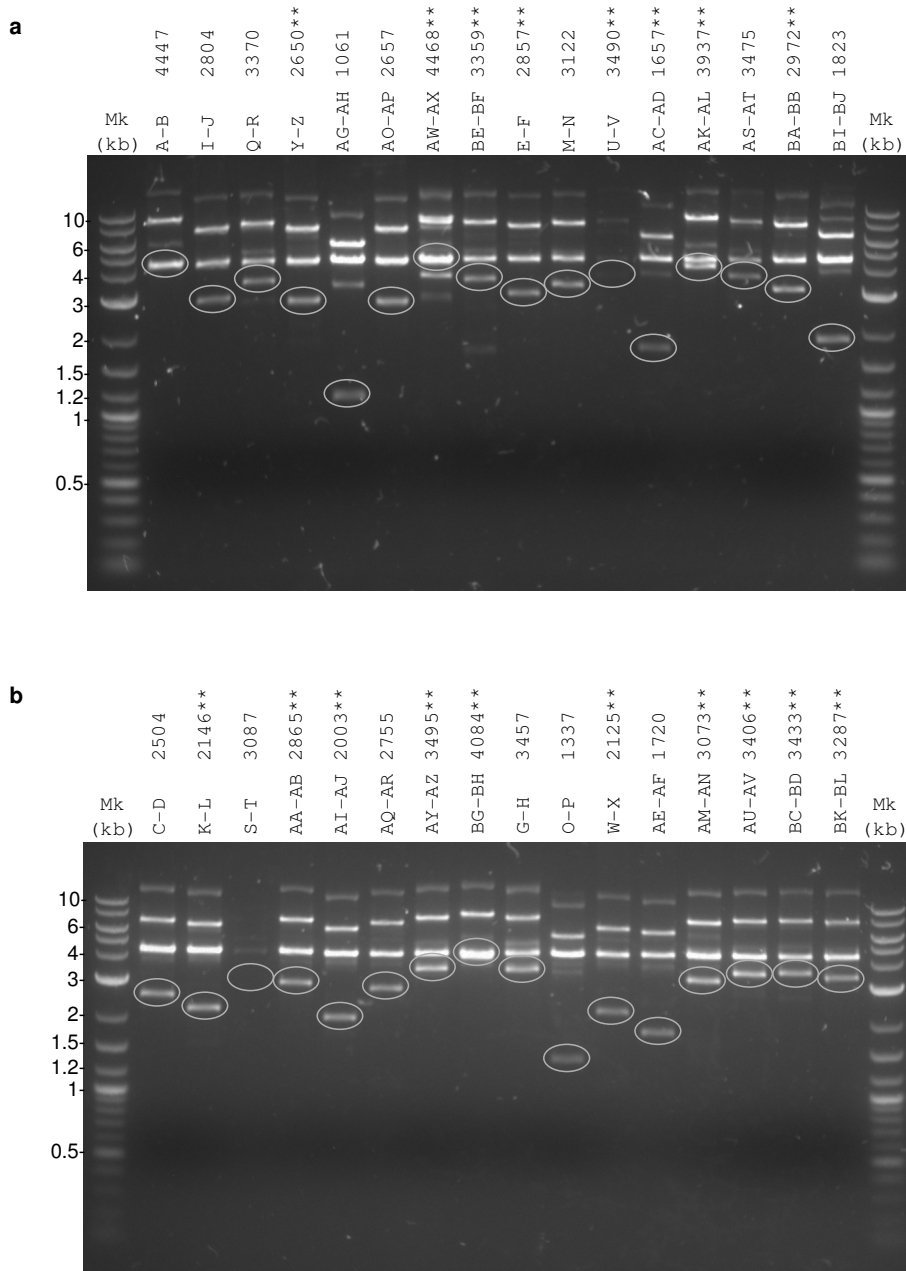

**Figure S4:** PSA level 2 product screening for selection in culture. **(a)** Approximately 400 ng of prepped DNA was digested with BsmBI and run on a 0.7% agarose gel for analysis. Products containing internal BsmBI sites are indicated with asterisks (\*\*), and expected fragment sizes are given in **(b)**. DNA marker (Mk) is indicated and expected insert bands are circled.

**a**

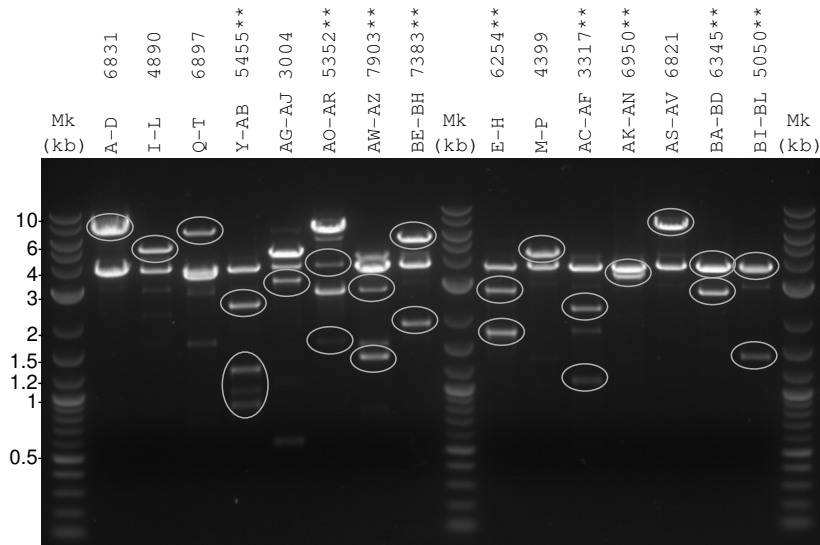

**b**

| sub-fragment | expected sizes for internal cuts (**) | sub-fragment | expected sizes for internal cuts (**) |
|--------------|---------------------------------------|--------------|---------------------------------------|
| A-D          |                                       | E-H          | 15, 1734, 1763, 2743                  |
| I-L          |                                       | M-P          |                                       |
| Q-T          |                                       | U-X          | not pictured                          |
| Y-AB         | 862, 1008, 1230, 2360                 | AC-AF        | 10, 1104, 2208                        |
| AG-AJ        |                                       | AK-AN        | 3347, 3608                            |
| AO-AR        | 1561, 3796                            | AS-AV        |                                       |
| AW-AZ        | 1388, 2711, 3809                      | BA-BD        | 2669, 3681                            |
| BE-BH        | 87, 1865, 5436                        | BI-BL        | 1402, 3653                            |
